# Supplementary material for: Atherosclerosis amelioration by allicin in raw garlic through gut microbiota and trimethylamine-N-oxide modulation
Source: PubMed Central journal article supplement (PMC8795425; doi:10.1038/s41522-022-00266-3), 2022-01-27
Supplement: 41522_2022_266_MOESM1_ESM.pdf [file 41522_2022_266_MOESM1_ESM.pdf]

## Supplementary Information

### Atherosclerosis Amelioration by Allicin in Raw Garlic through Gut Microbiota and Trimethylamine-*N*-Oxide Modulation

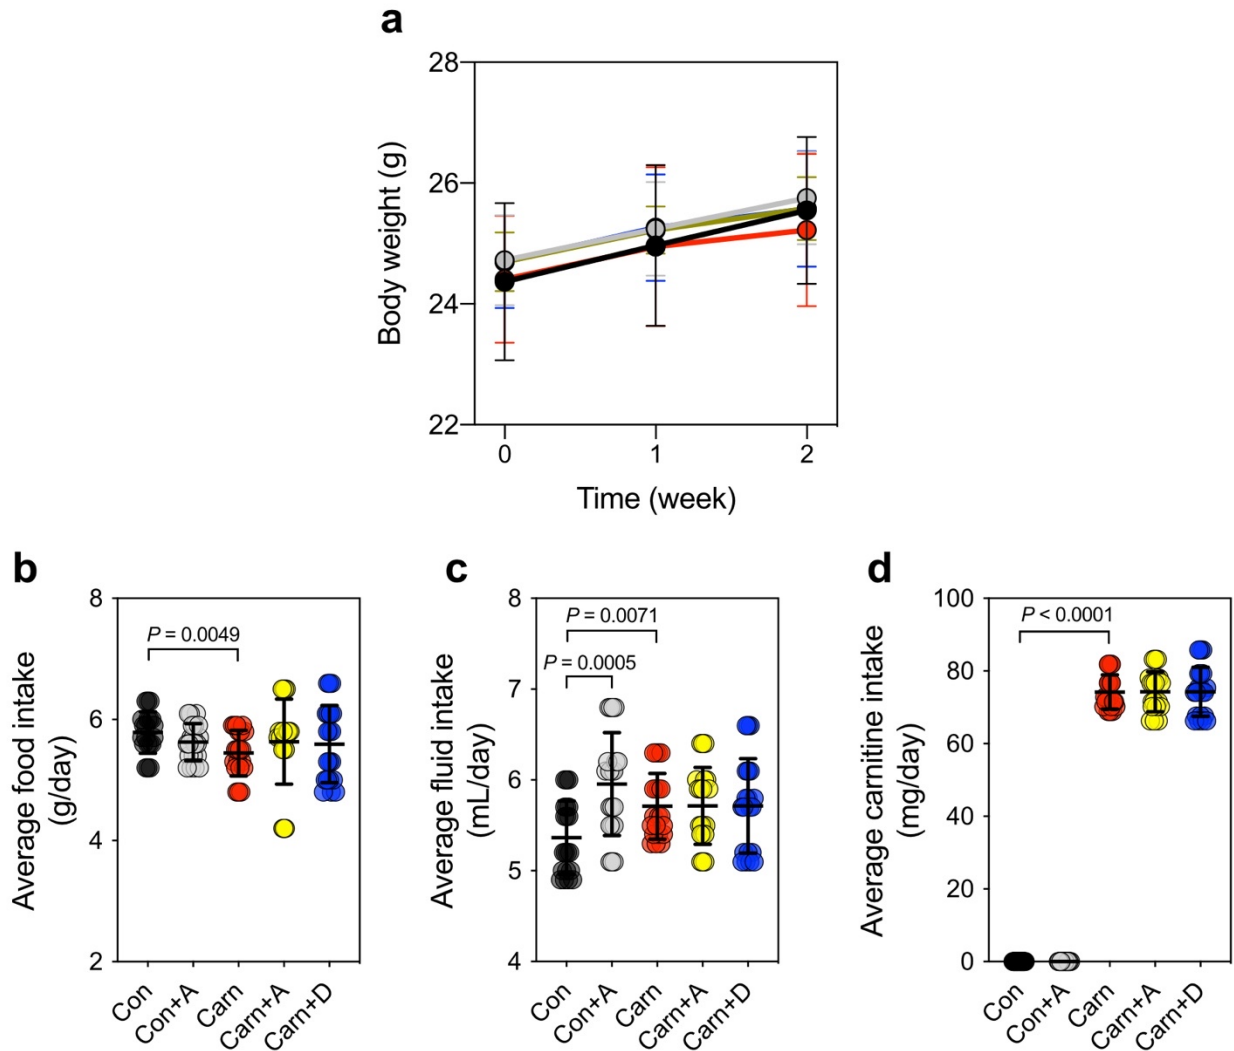

**Supplementary Fig. 1 | Effect of allicin and carnitine on L-carnitine-induced atherosclerosis in male C57BL/6J mice.** (a) Changes in body weight; (b) average food intake; (c) average fluid intake; and (d) average carnitine intake. Dot plots are expressed as the mean  $\pm$  SD. Statistical analyses were performed using the unpaired two-tailed Student's t-test Con vs. Con + A group, Con vs. Carn group; one-way ANOVA with Tukey's range test for comparisons Carn vs. Carn + A group, Carn vs. Carn + D group, and Carn + A vs. Carn + D group.

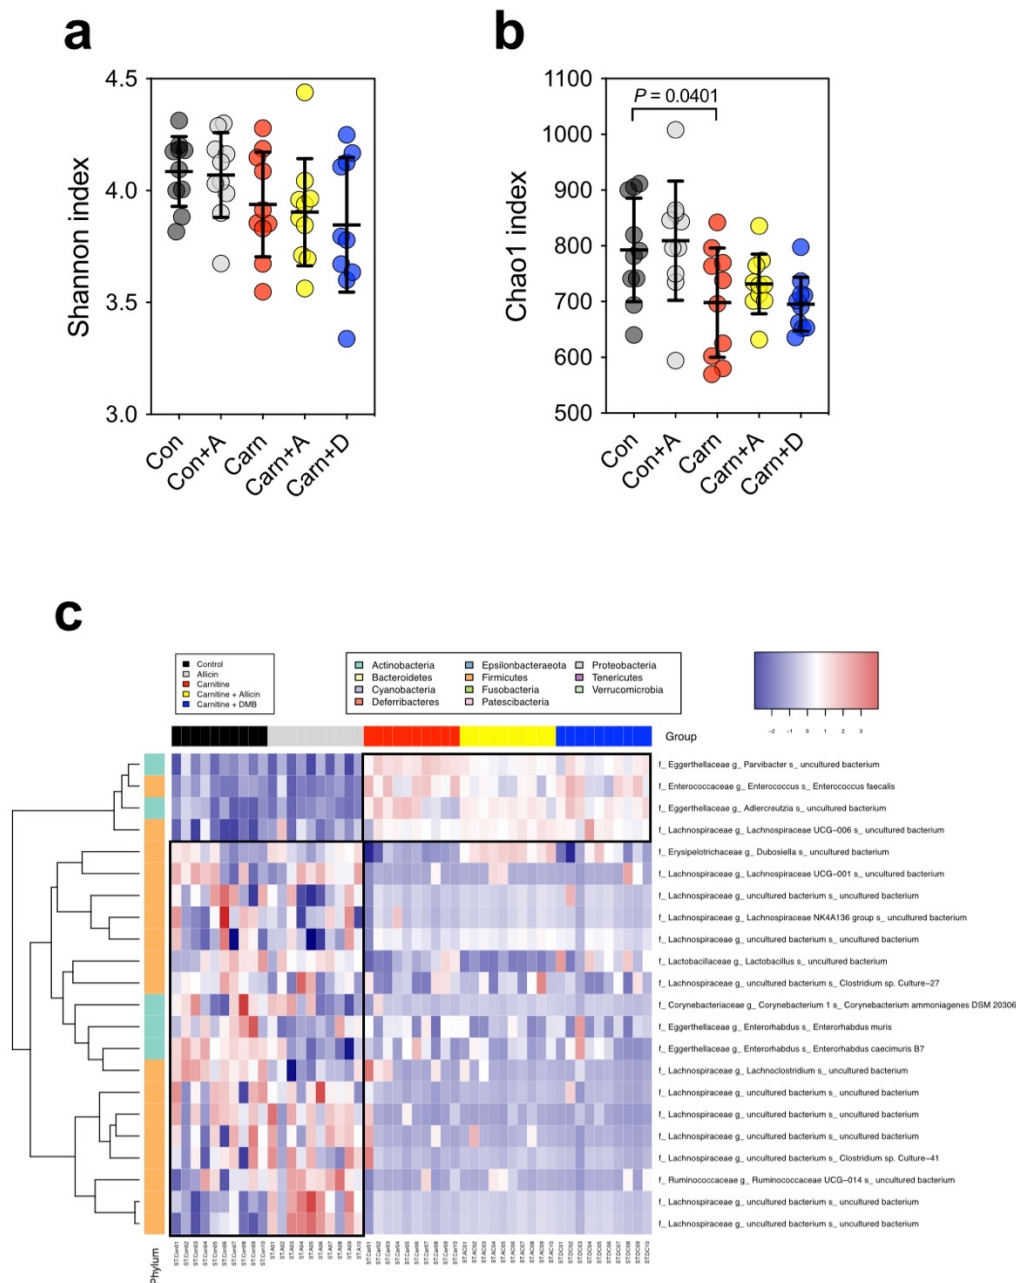

**Supplementary Fig. 2 | L-carnitine primarily affected the fecal microbial composition of male C57BL/6J mice.**  $\alpha$ -diversity indices, (a) Shannon index and (b) Chao1 index. (c) Heat map of the relative abundances at OTU level of fecal microbiota with a significant difference, as evaluated using the Kruskal–Wallis test with false discovery rate (FDR) ( $q < 0.01$ ). Dot plots are expressed as the mean  $\pm$  SD. Statistical analyses of  $\alpha$ -diversity indices were performed using the unpaired two-tailed Student’s t-test Con vs. Con + A group, Con vs. Carn group; one-way ANOVA with Tukey’s range test for comparisons Carn vs. Carn + A group, Carn vs. Carn + D group, and Carn + A vs. Carn + D group.

**a**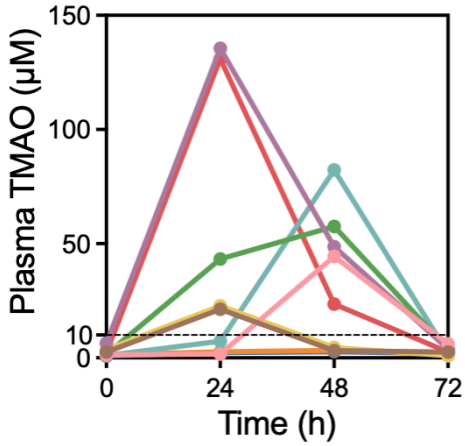**b**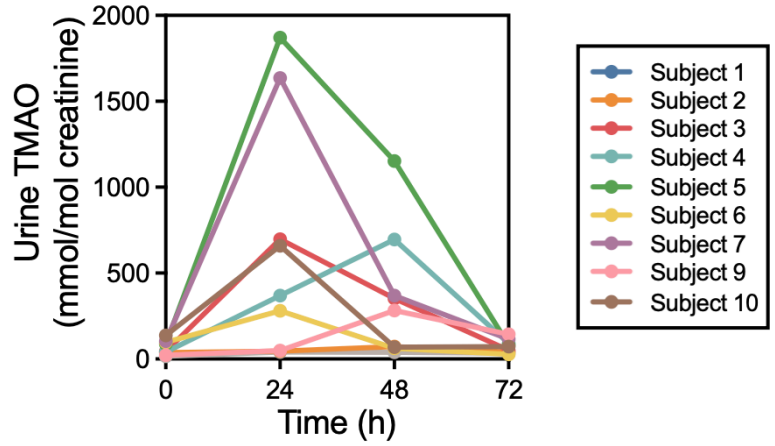

**Supplementary Fig. 3 | Screening of high-TMAO producers using oral carnitine challenge test (OCCT) based on plasma TMAO level  $\geq 10 \mu\text{M}$  in participants (n=9).** (a) Plasma and (b) urine TMAO; OCCT was performed by collecting the blood and urine samples as a baseline and subsequently administering three carnitine tablets (1,500 mg), followed by the collection of blood/urine at 24, 48, and 72 h.

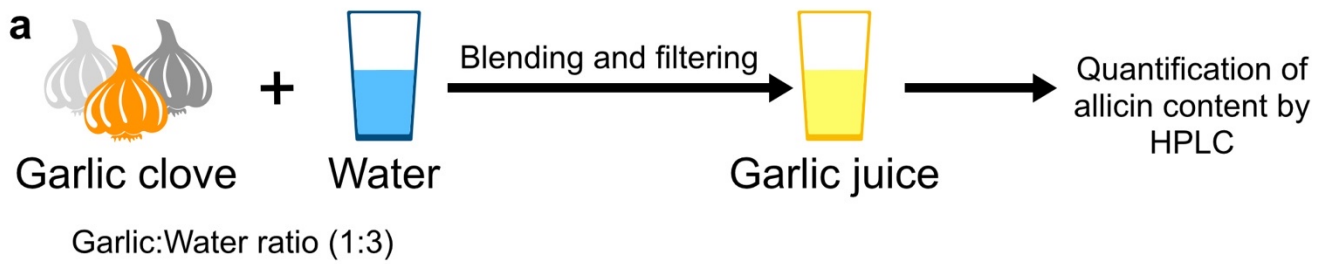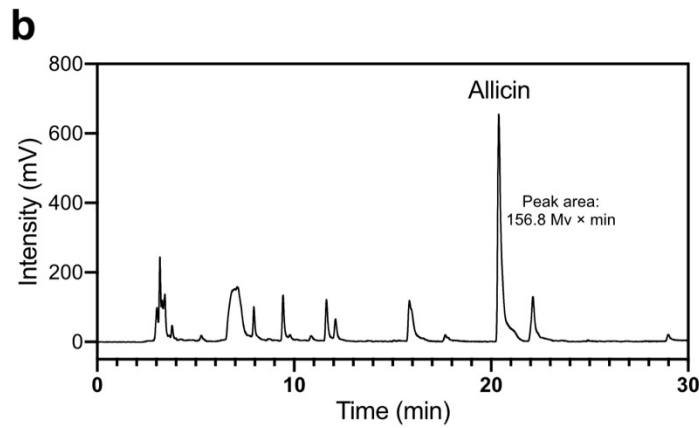

**c**

| Amount to be taken per day                                                          |                                                                                     |                                                                                     |                                                                                       |                                                                                       |
|-------------------------------------------------------------------------------------|-------------------------------------------------------------------------------------|-------------------------------------------------------------------------------------|---------------------------------------------------------------------------------------|---------------------------------------------------------------------------------------|
|                                                                                     | Alliin                                                                              |                                                                                     | Garlic juice                                                                          | Garlic                                                                                |
|  |  |  |  |  |
| <chem>CC=CC(=O)SCC=C</chem>                                                         | <chem>CC=CC(=O)SCC=C</chem>                                                         | <chem>CC=CC(=O)SCC=C</chem>                                                         |                                                                                       |                                                                                       |
| Mouse                                                                               | Human equivalent dose                                                               | 60 kg human                                                                         | 60 kg human                                                                           | 60 kg human                                                                           |
| 10 mg/kg bw                                                                         | 0.8 mg/kg bw                                                                        | 48 mg                                                                               | 55 mL<br>(alliin content<br>0.89 mg/ml)                                               | 13.5 g<br>(2.7 cloves<br>[5 g/clove])                                                 |

**Supplementary Fig. 4 | Garlic juice preparation and mouse to human equivalent dose translation.** (a) Garlic juice preparation; (b) HPLC chromatogram indicates that the major component in garlic juice is alliin; (c) mouse to human equivalent dose translation of alliin and garlic juice.

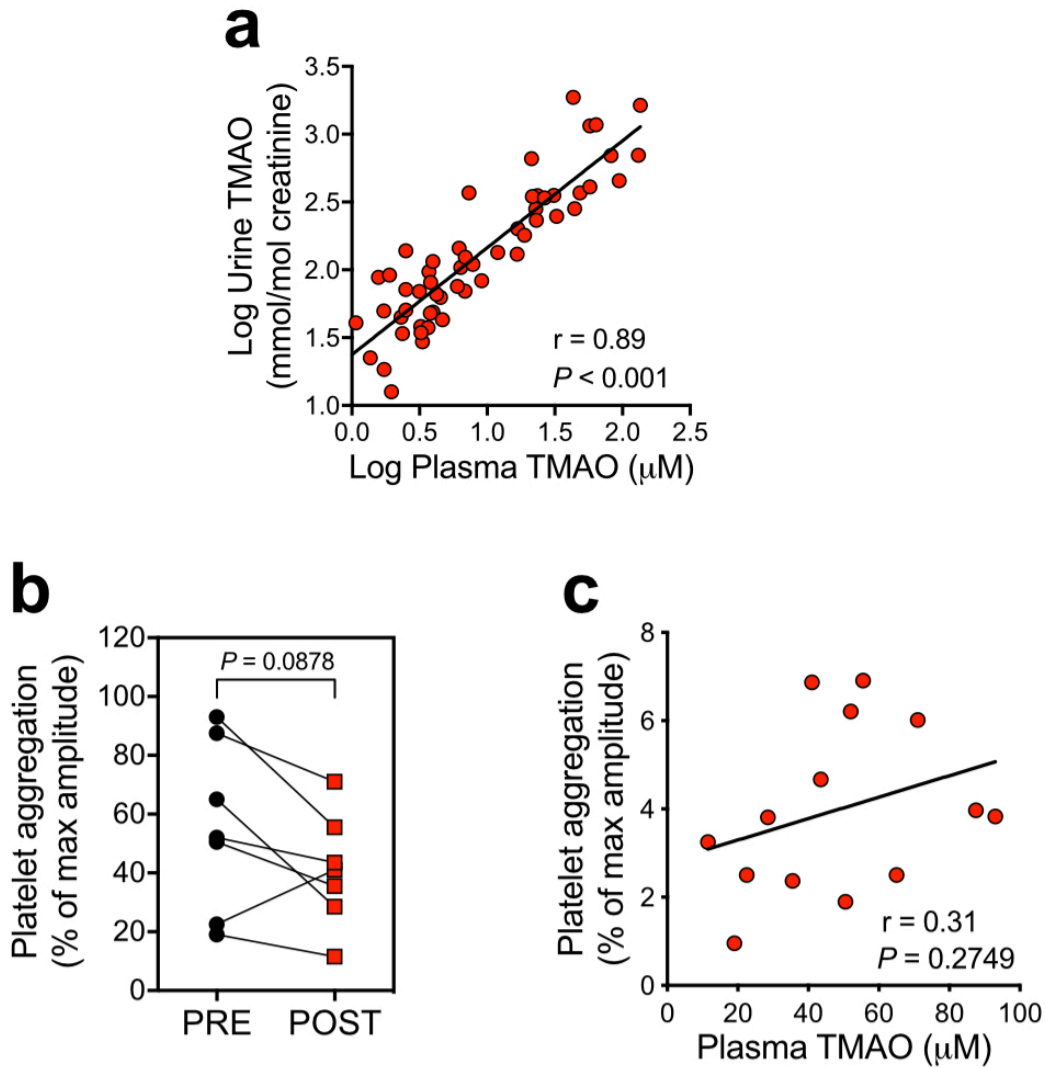

**Supplementary Fig. 5 | Effect of raw garlic juice on plasma–urine TMAO correlation and platelet aggregation in TMAO producers (n=7) who received an intervention of garlic juice (55 mL, equivalent to 48 mg of allicin/day) for 1 week, following which they were subject to OCCT. (a) Pearson’s correlation of log plasma and urine TMAO, (b) platelet aggregation; and (c) Pearson’s correlation of plasma TMAO level and platelet aggregation. Statistical analysis was performed using the two-tailed paired Student’s t-test.**

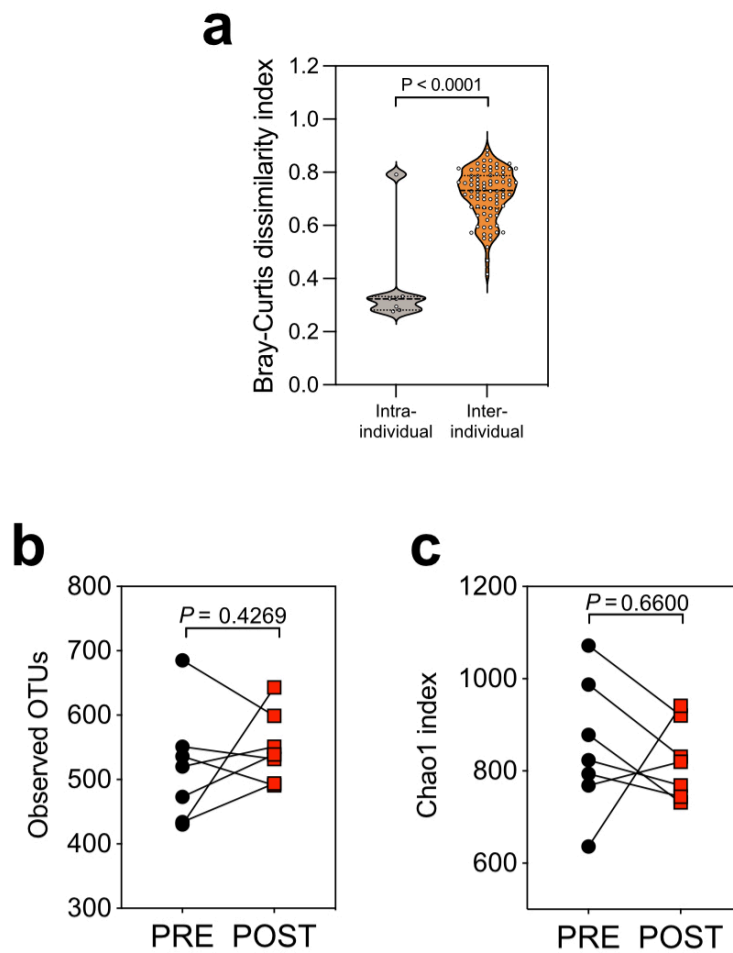

**Supplementary Fig. 6 | Effect of raw garlic juice on fecal microbiota in healthy TMAO-producing participants.** (a) Bray-Curtis dissimilarity,  $\alpha$ -diversity index (b) observed OTUs, and (c) Chao1 index. Statistical analyses were performed using the two-tailed unpaired Student's t-test for dissimilarity index and paired Student's t-test for  $\alpha$ -diversity indices.

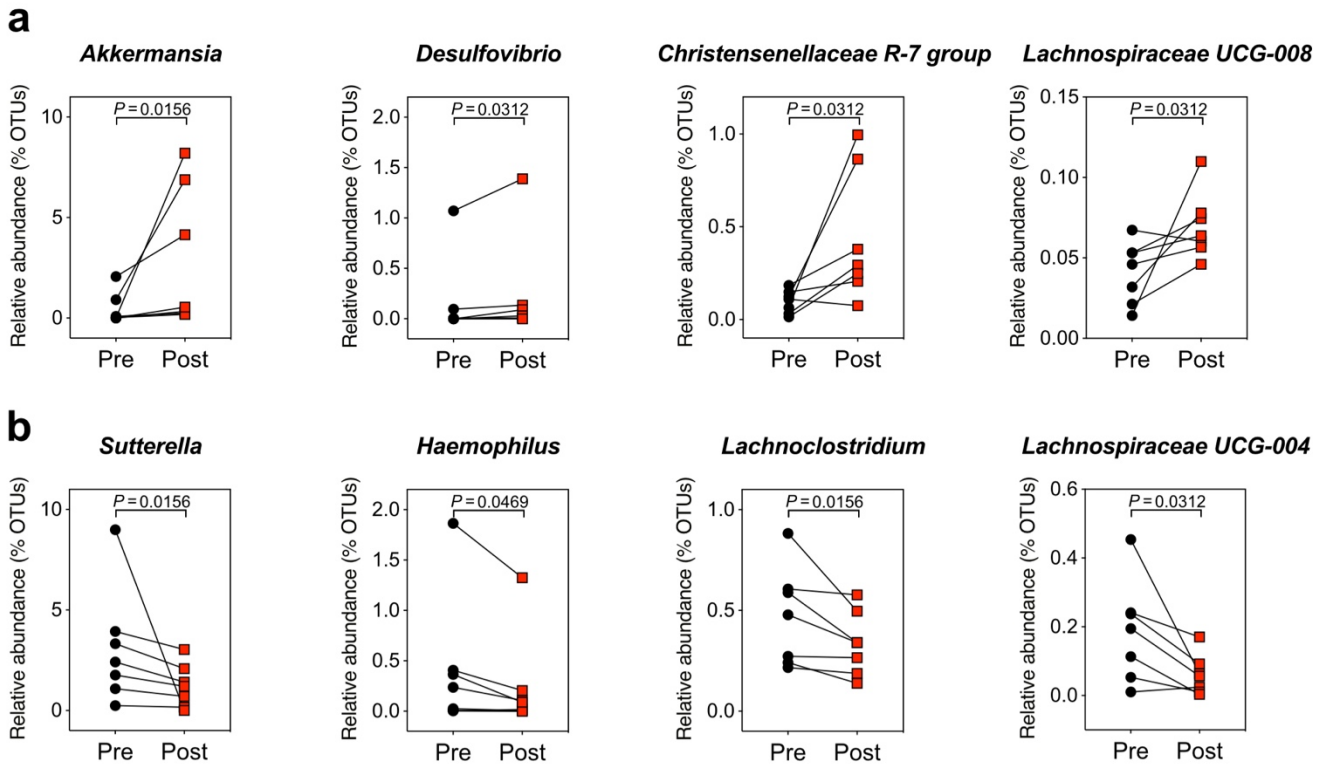

**Supplementary Fig. 7 | Effect of raw garlic juice on the fecal microbiota at the genus level in TMAO producers (n=7) who received an intervention of garlic juice (55 mL, equivalent to 48 mg of allicin/day) for 1 week, followed by OCCT. (a) Genera exhibiting an increase in relative abundance, (b) Genera exhibiting a decrease in relative abundance after the intake of raw garlic juice for 1 week. Statistical analysis was performed using the paired-Wilcoxon signed-rank test.**

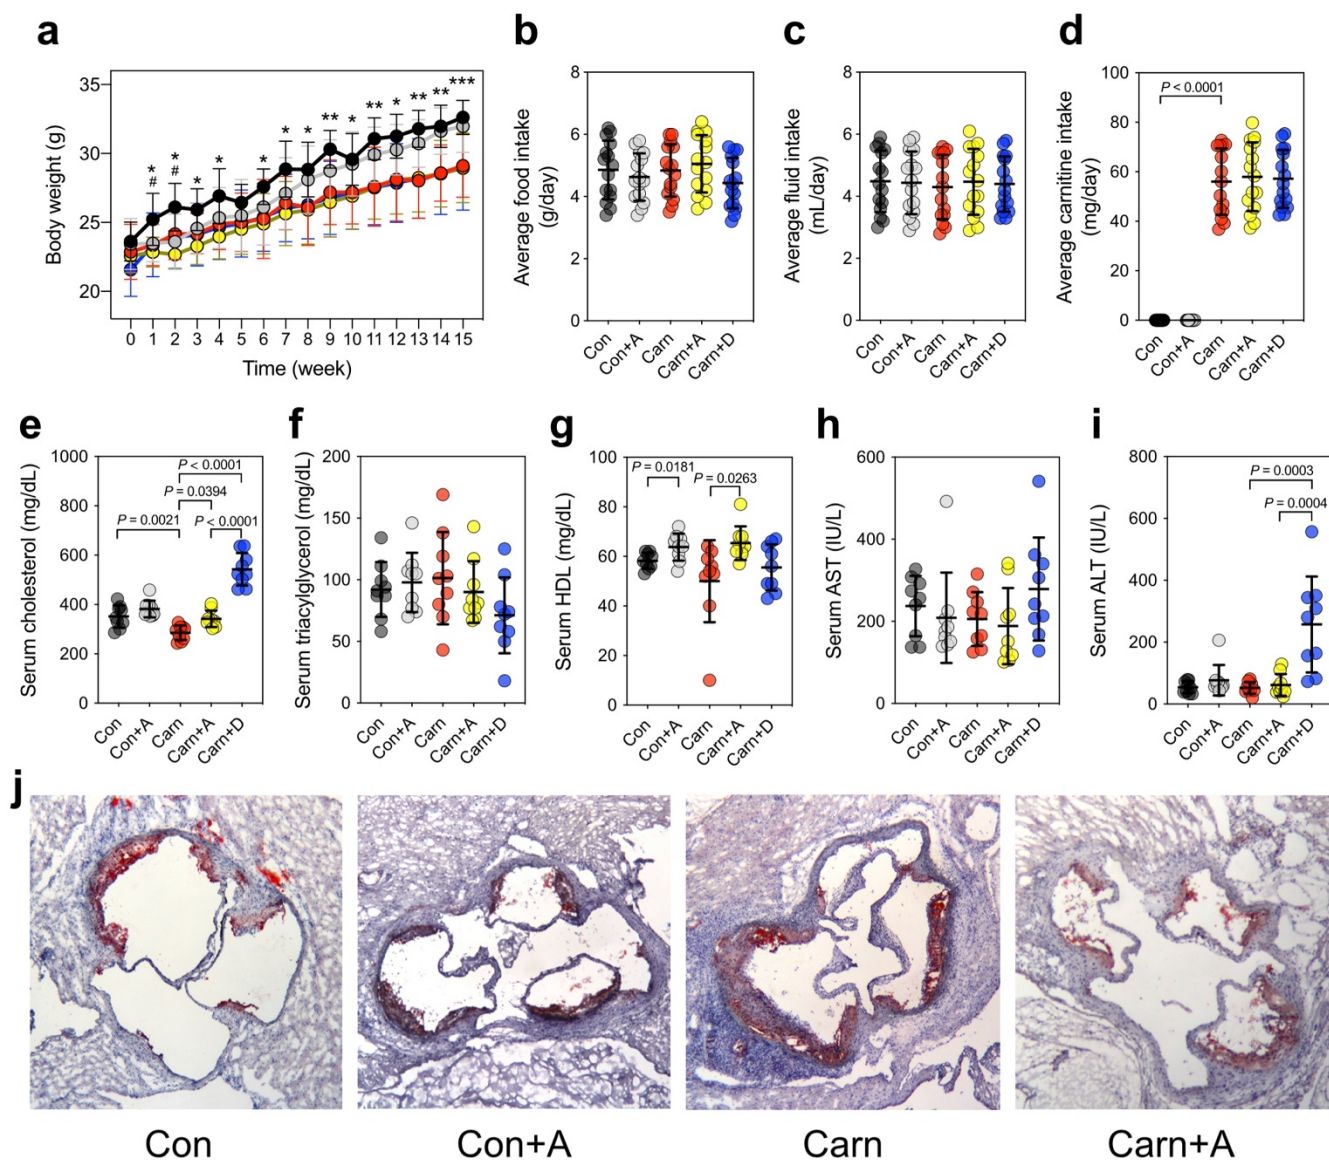

**Supplementary Fig. 8 | Effect of allicin and carnitine on L-carnitine-induced atherosclerosis in  $ApoE^{-/-}$  mice.** (a) Changes in body weight; (b) average food intake; (c) average fluid intake; (d) average carnitine intake; (e) serum cholesterol; (f) triacylglycerol; (g) high-density lipoprotein (HDL); (h) aspartate aminotransferase (AST); (i) alanine aminotransferase (ALT); and (j) representative image of atherosclerotic lesions in the aortic root. Dot plots are expressed as the mean  $\pm$  SD. Statistical analyses were performed using the unpaired two-tailed Student's t-test Con vs. Con + A group (#,  $P < 0.05$ ), Con vs. Carn group (\*,  $P < 0.05$ ; \*\*,  $P < 0.01$ ; and \*\*\*,  $P < 0.001$ ); one-way ANOVA with Tukey's range test for comparisons Carn vs. Carn + A group, Carn vs. Carn + D group, and Carn + A vs. Carn + D group.



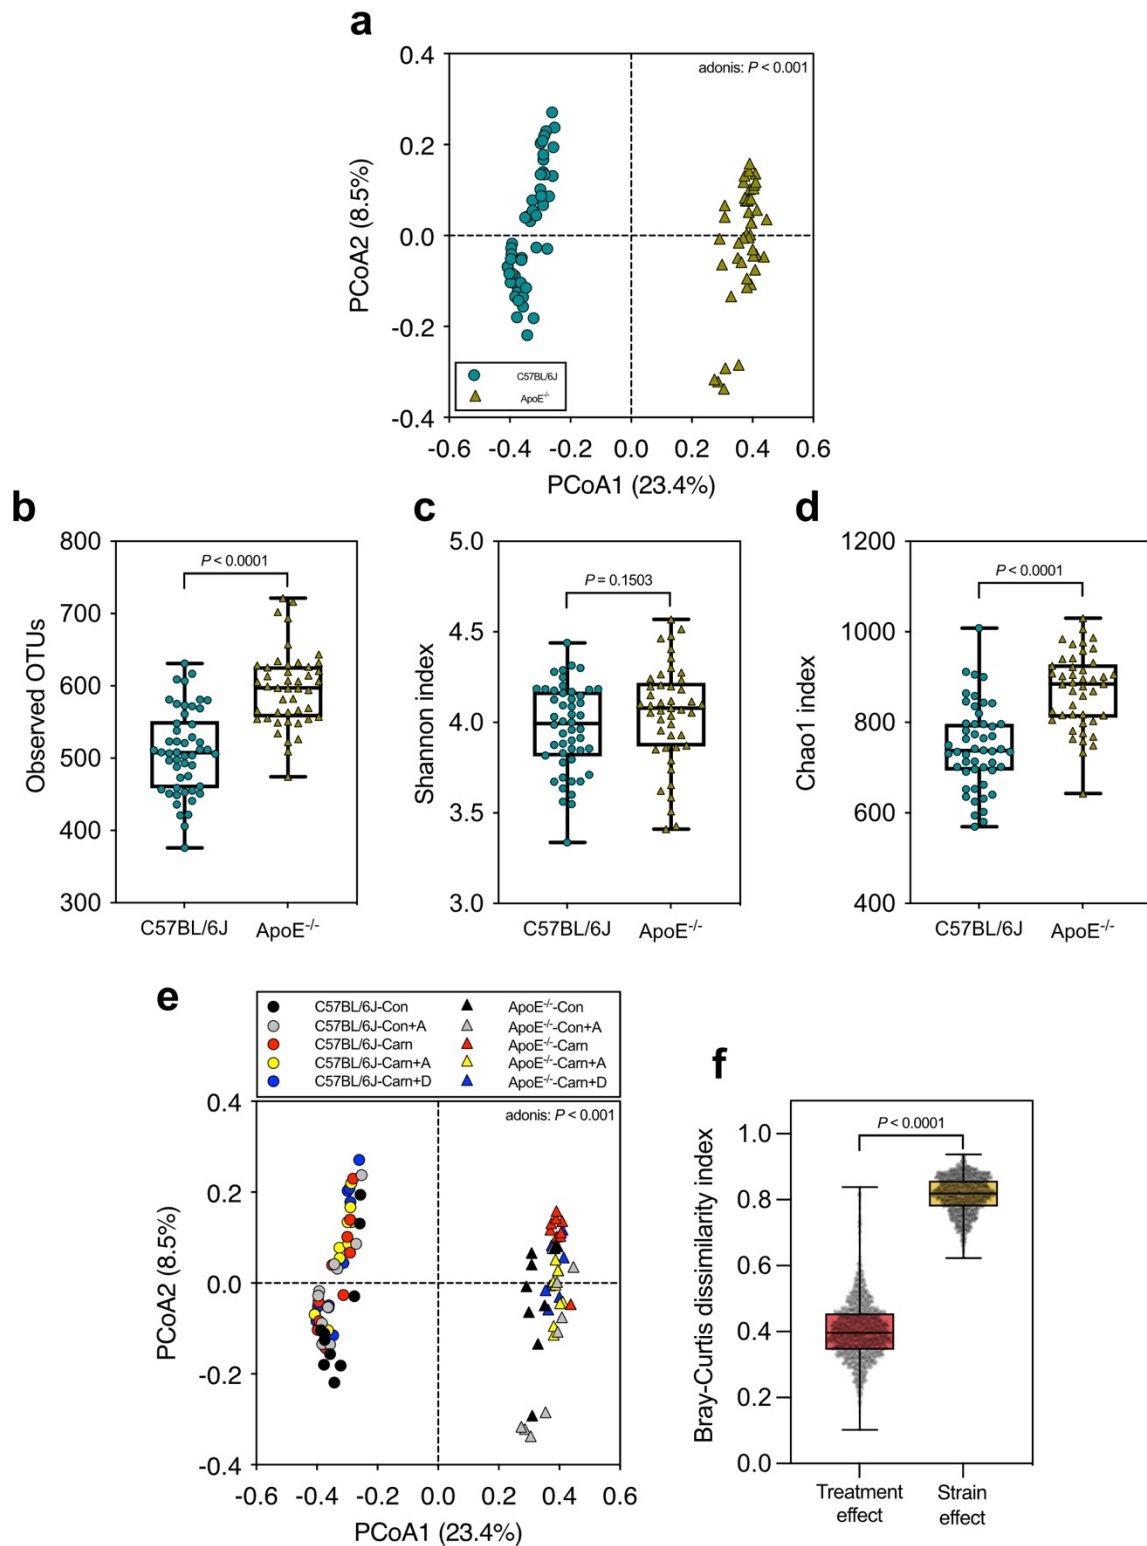

**Supplementary Fig. 9 | C57BL/6J and ApoE<sup>-/-</sup> mice have different gut microbial composition based on  $\alpha$ - and  $\beta$ -diversity. The effect of the mouse strain was more prominent on gut microbial composition than the treatment effect.** (a) principal coordinate analysis (PCoA) plot with Bray–Curtis dissimilarity comparing C57BL/6J and ApoE<sup>-/-</sup> mice;  $\alpha$ -diversity indices (b) observed OTUs; (c) Shannon index; (d) Chao1 index. (e) PCoA plot with Bray–Curtis dissimilarity comparing C57BL/6J and ApoE<sup>-/-</sup> mice with different treatment; and (f) Bray–Curtis dissimilarity index of treatment and mouse strain effect. Statistical analysis was performed using the unpaired two-tailed Student’s t-test and presented with a  $P$ -value. Box plots display median, quartiles (boxes), and range (whiskers).

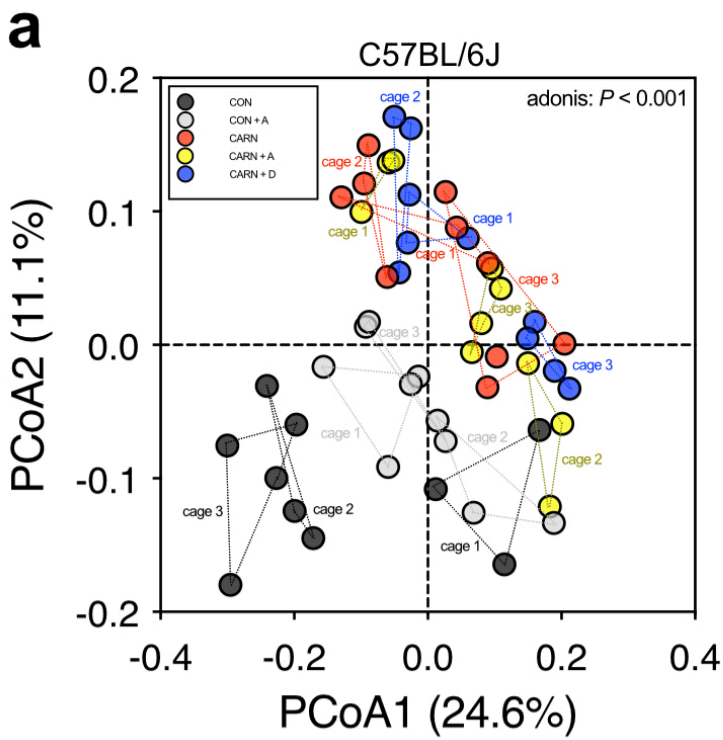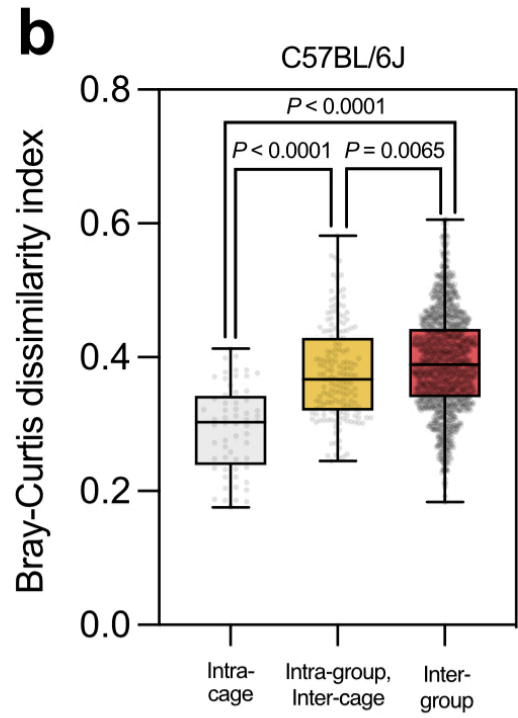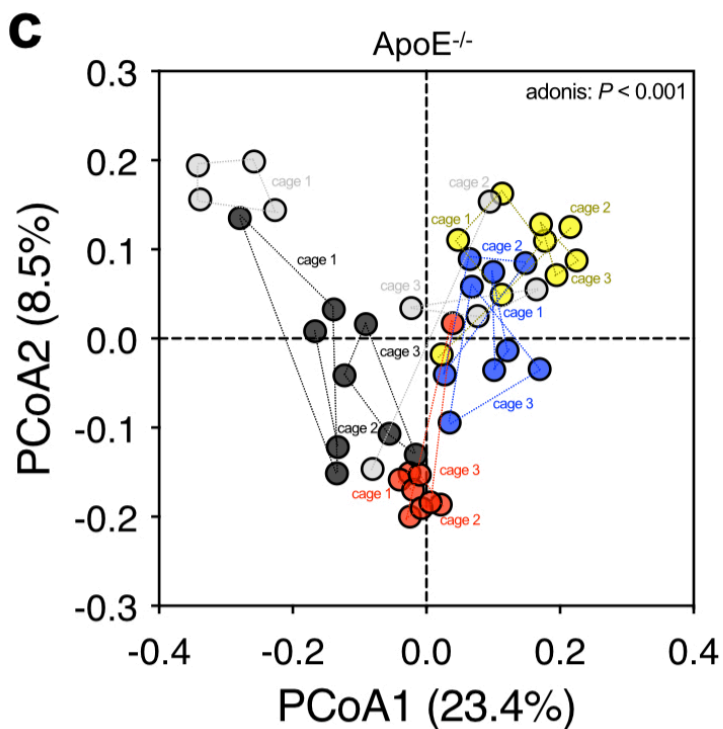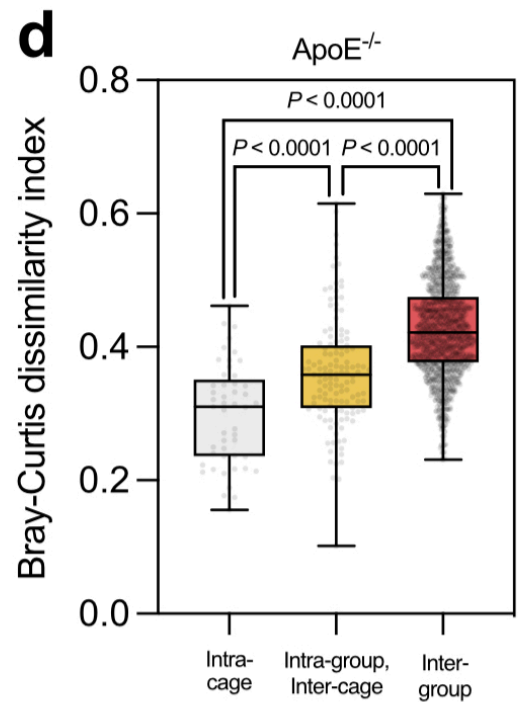

**Supplementary Fig. 10 | Treatment effects on the gut microbiota were more prominent than the cage effect in both C57BL/6J and ApoE<sup>-/-</sup> mice.** (a) principal coordinate analysis (PCoA) plot with Bray–Curtis dissimilarity of C57BL/6J mice; (b) Bray–Curtis dissimilarity index of C57BL/6J mouse fecal microbiota based on intra-cage, intra-group-inter-cage, and inter group; (c) PCoA plot with Bray–Curtis dissimilarity of ApoE<sup>-/-</sup> mice; (d) Bray–Curtis dissimilarity index of ApoE<sup>-/-</sup> mouse fecal microbiota based on intra-cage, intra-group-inter-cage, and inter group. Statistical analysis was performed using the unpaired two-tailed Student’s t-test and presented with a  $P$ -value. Box plots display median, quartiles (boxes), and range (whiskers).

## High-TMAO producer 1

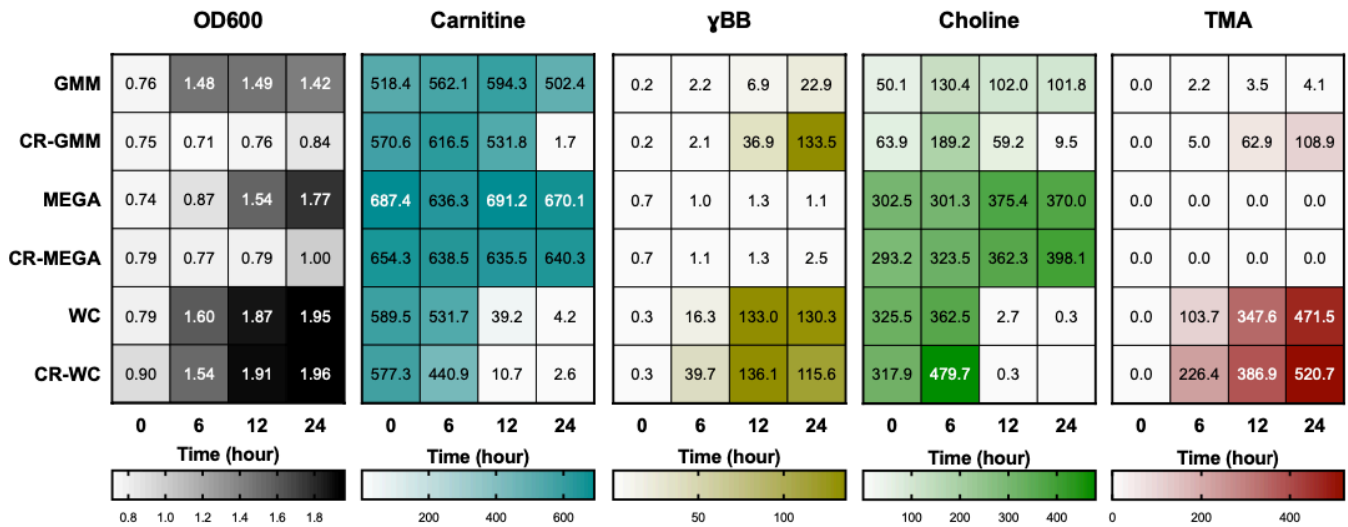

## High-TMAO producer 2

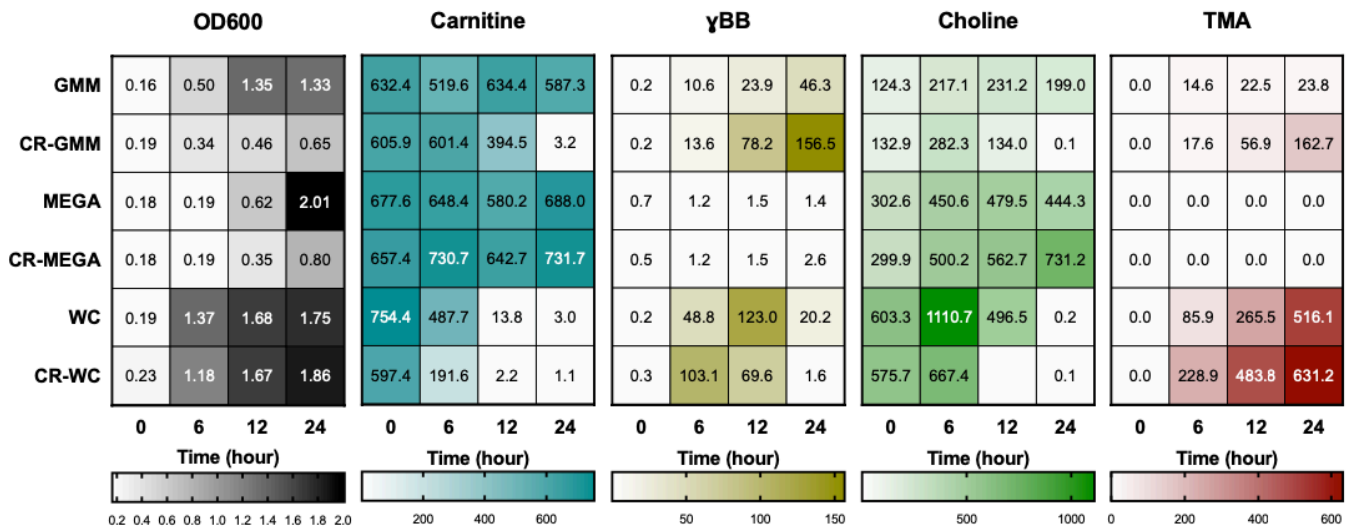

**Supplementary Fig. 11 | Comparison of the TMA-producing ability in different media and its carbon-reduced media supplemented with L-carnitine and inoculated with feces from two high-TMAO producers.** The Wilkins–Chalgren (WC) medium and its carbon-reduced medium exhibited the highest concentration of TMA after 24 h of culture. GMM: gut microbiota medium; MEGA: mega medium; WC: Wilkins–Chalgren medium; CR-GMM: carbon-reduced gut microbiota medium; CR-MEGA: carbon-reduced MEGA medium; CR-WC: carbon-reduced Wilkins–Chalgren medium.

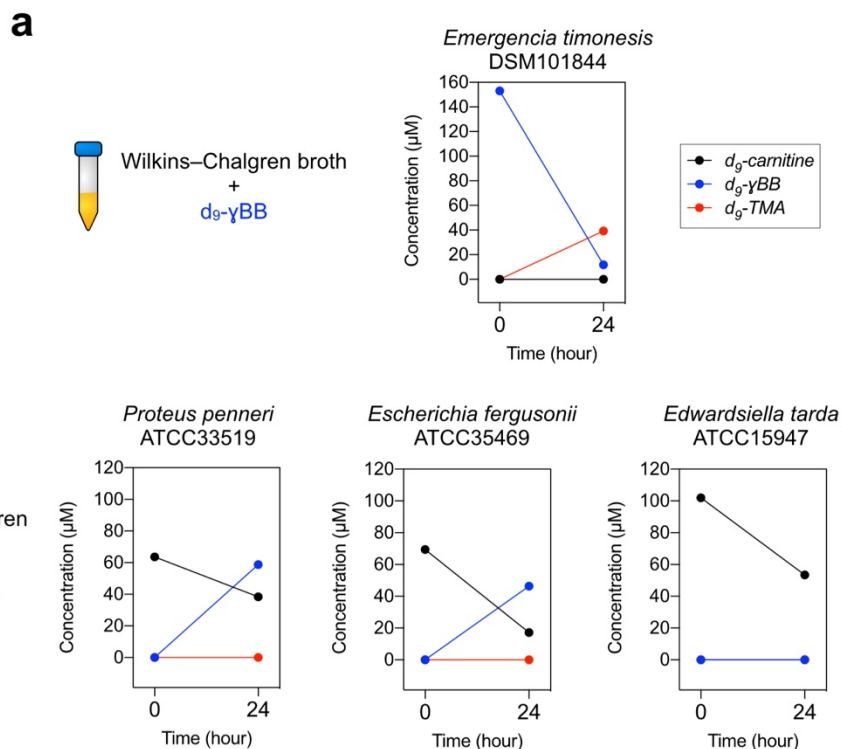

**Supplementary Fig. 12 | Utilization of  $d_9$ - $\gamma$ BB and  $d_9$ -carnitine by single bacterial species and their co-culture.** The utilization of (a)  $d_9$ - $\gamma$ BB by *Emergencia timonensis* DSM101844 for production of  $d_9$ -TMA in Wilkins–Chalgren (WC) broth supplemented with  $d_9$ - $\gamma$ BB, and the utilization of (b)  $d_9$ -carnitine by *Proteus penneri* ATCC33519, *Escherichia fergusonii* ATCC35469, *Edwardsiella tarda* ATCC15947, and their co-culture in WC supplemented with  $d_9$ -carnitine.

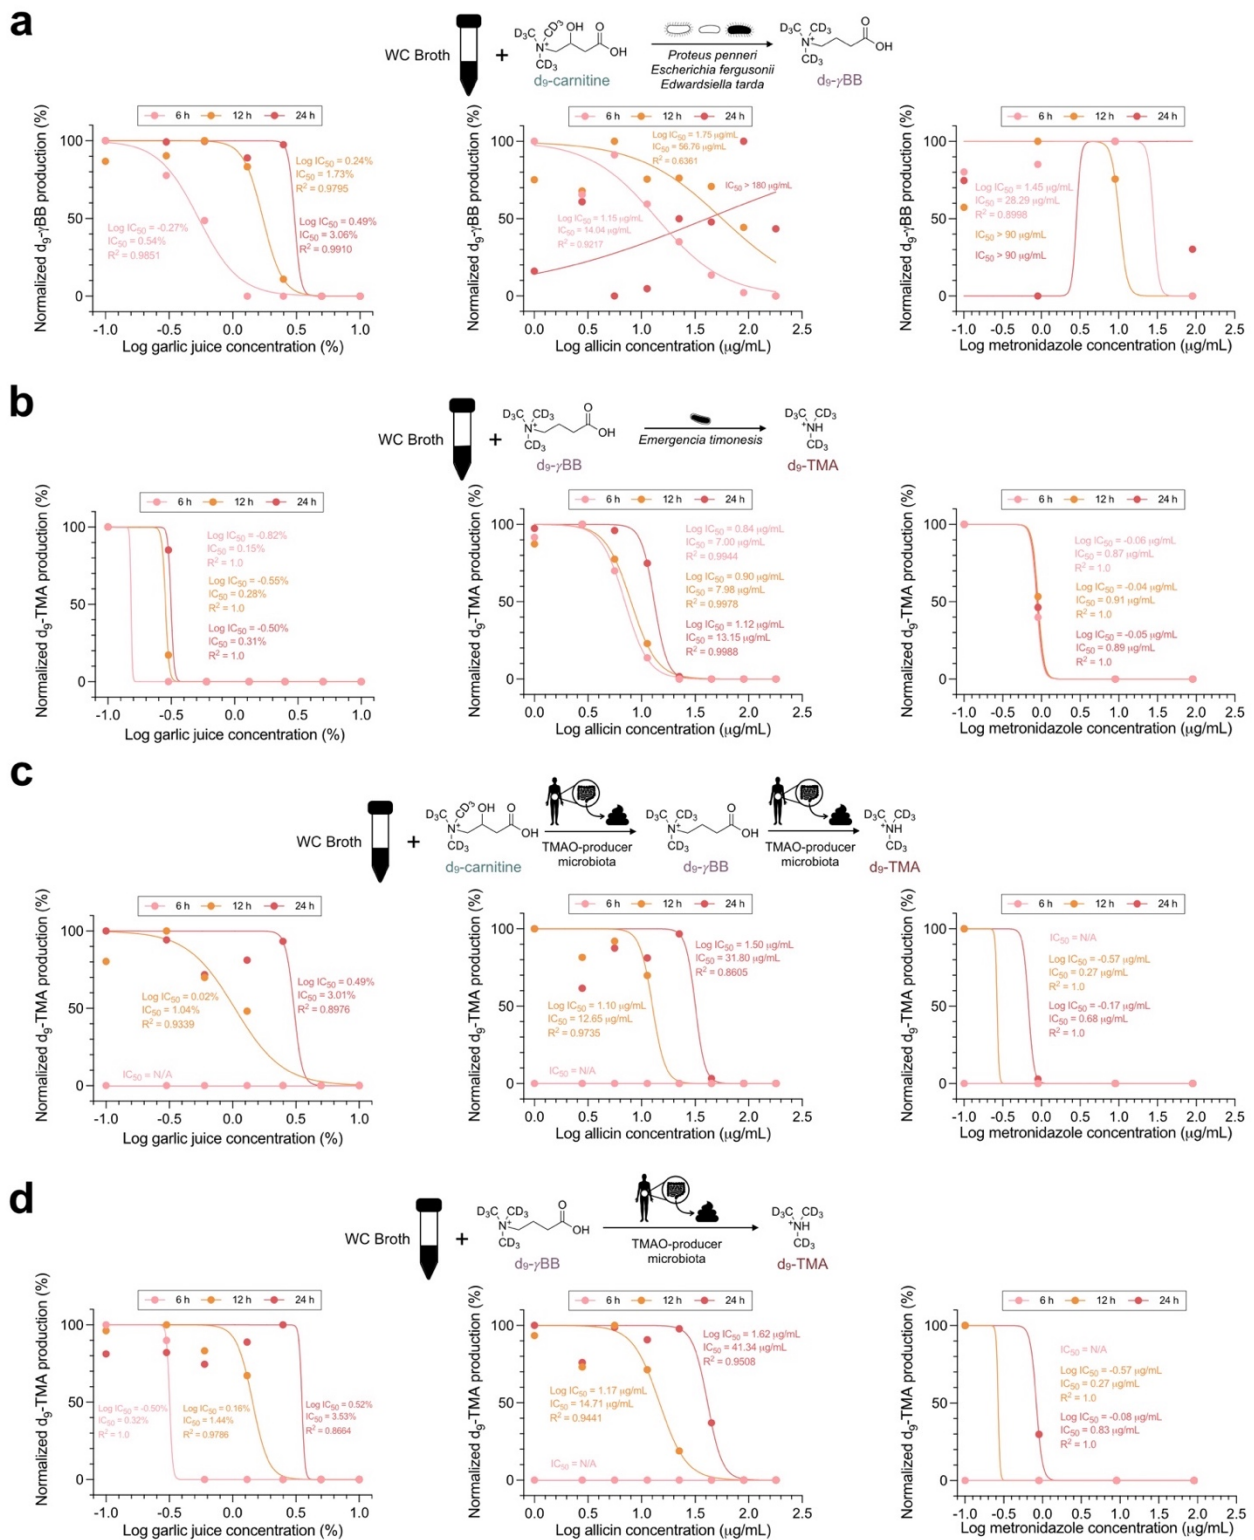

**Supplementary Fig. 13 | Half maximal inhibitory concentration (IC<sub>50</sub>) of garlic juice, allicin, and metronidazole to inhibit the formation of  $d_9$ - $\gamma$ BB and  $d_9$ -TMA in vitro after inoculation of TMA/ $\gamma$ BB-producing bacteria and ex vivo after inoculation of the feces from high-TMAO producers. (a) inhibitory effect of garlic juice, allicin, and metronidazole on carnitine  $\rightarrow$   $\gamma$ BB bacteria (co-culture of *Proteus penneri*, *Escherichia fergusonii*, and *Edwardsiella tarda*) in Wilkins–Chalgren (WC) broth supplemented with  $d_9$ -carnitine; (b) inhibitory effect on the bacteria converting  $\gamma$ BB to TMA (*Emergencia timonensis*) in WC broth supplemented with  $d_9$ - $\gamma$ BB. (c) Inhibitory effect on the high-TMAO-producing gut microbiome in WC broth supplemented with  $d_9$ -carnitine and (d)  $d_9$ - $\gamma$ BB. Half-maximal inhibitory concentration (IC<sub>50</sub>) values were determined using nonlinear regression at 6, 12, and 24 h.**

**Supplementary Table 1.** | Effect of raw garlic juice on plasma biochemistry of TMAO producers (n=7) who received garlic juice intervention (55 mL, equivalent to 48 mg of allicin/day) for 1 week.

| Blood biochemistry <sup>1</sup> | Garlic Juice Intervention <sup>2</sup> |              | <i>P</i> -value <sup>3</sup> | Normal ranges   |
|---------------------------------|----------------------------------------|--------------|------------------------------|-----------------|
|                                 | PRE (n = 7)                            | POST (n = 7) |                              |                 |
| Glucose-AC (mg/dL)              | 78.0 ± 12.4                            | 80.1 ± 6.9   | 0.5757                       | 65-100 (mg/dL)  |
| AST (U/L)                       | 16.9 ± 3.4                             | 21.1 ± 5.6   | 0.0105                       | <40 (U/L)       |
| ALT (U/L)                       | 9.6 ± 8.6                              | 13.4 ± 9.4   | 0.0012                       | <41 (U/L)       |
| BUN (mg/dL)                     | 12.9 ± 3.3                             | 11.2 ± 1.0   | 0.2615                       | 6-20 (mg/dL)    |
| Creatinine (mg/dL)              | 0.8 ± 0.2                              | 0.8 ± 0.1    | 0.1723                       | 0.7-1.2 (mg/dL) |
| T-Cholesterol (mg/dL)           | 176.6 ± 33.5                           | 189.4 ± 50.0 | 0.3430                       | <200 (mg/dL)    |
| Triglyceride (mg/dL)            | 78.9 ± 20.7                            | 71.6 ± 24.5  | 0.2846                       | <150 (mg/dL)    |
| HDL-C (mg/dL)                   | 64.1 ± 16.3                            | 66.4 ± 17.1  | 0.0703                       | >40 (mg/dL)     |
| LDL-C (mg/dL)                   | 106.6 ± 29.9                           | 122.1 ± 49.4 | 0.2511                       | <100 (mg/dL)    |
| CRP-C (mg/dL)                   | 0.04 ± 0.03                            | 0.05 ± 0.05  | 0.3559                       | <0.50 (mg/dL)   |

<sup>1</sup> Abbreviation: AST, Aspartate aminotransferase; ALT, Alanine aminotransferase; BUN, Blood urea nitrogen; HDL-C, High density lipoprotein cholesterol; LDL-C, Low density lipoprotein cholesterol, CRP-C, C reactive protein.

<sup>2</sup> Blood biochemistry data of healthy subjects are shown above. All data are presented as mean ± SD.

<sup>3</sup> P-value calculated using the two-tailed paired Student's t-test comparing PRE and POST garlic juice intervention are shown.

## Supplementary Table 2 | Resources information

| Resource or reagent                                    | Source                    | Identifier  |
|--------------------------------------------------------|---------------------------|-------------|
| <b>Bacterial strains</b>                               |                           |             |
| <i>Proteus penneri</i> CDC 1808-73                     | ATCC                      | 33519       |
| <i>Escherichia fergusonii</i> CDC 0568-73              | ATCC                      | 35469       |
| <i>Edwardsiella tarda</i> CDC 1483-59                  | ATCC                      | 15947       |
| <i>Emergencia timonensis</i> SN18                      | Leibniz Institute         | DSM101844   |
| <b>Chemicals</b>                                       |                           |             |
| 3,3-dimethyl-1-butanol (DMB)                           | Sigma-Aldrich             | Cat#183105  |
| Adenosine 5'-diphosphate sodium salt                   | Sigma-Aldrich             | Cat#A2754   |
| Allicin                                                | Panyod et al., 2020       | N/A         |
| AMPure XP beads                                        | Beckman Coulter           | A63881      |
| Carboxymethyl cellulose                                | Sigma-Aldrich             | Cat#C4888   |
| DL-Carnitine-(trimethyl-d <sub>9</sub> ) hydrochloride | Sigma-Aldrich             | Cat#729868  |
| Gelatin peptone                                        | Sigma-Aldrich             | Cat#70176   |
| Glucose                                                | Bioshop                   | Glu501.1    |
| Hemin                                                  | Sigma-Aldrich             | Cat#H9039   |
| KAPA HiFi HotStart ReadyMix                            | Roche                     | KK2602      |
| L-Carnitine-(methyl-d <sub>3</sub> ) hydrochloride     | Sigma-Aldrich             | Cat#616737  |
| L-Arginine                                             | Sigma-Aldrich             | Cat#AS006   |
| L-carnitine                                            | General Nutrition Centers | 802420      |
| L-carnitine hydrochloride                              | Sigma-Aldrich             | Cat#C0283   |
| L-cysteine                                             | Sigma-Aldrich             | Cat#168149  |
| Menadione                                              | Sigma-Aldrich             | Cat#M5625   |
| Nextera XT Index Kit                                   | Illumina                  | FC-131-1096 |
| Oil red O                                              | Sigma-Aldrich             | Cat#O0625   |
| Propylene glycol (1,2-Propanediol)                     | Sigma-Aldrich             | Cat#134368  |
| Sodium chloride                                        | Bioshop                   | SOD002.1    |
| Sodium citrate                                         | Mallinkrodt               | 0754-12     |
| Sodium pyruvate                                        | Sigma-Aldrich             | Cat#P2256   |

|                                                              |                            |            |
|--------------------------------------------------------------|----------------------------|------------|
| Trimethyl- <sup>13</sup> C <sub>3</sub> -amine hydrochloride | Sigma-Aldrich              | Cat#591599 |
| Trimethyl-d <sub>9</sub> -amine hydrochloride                | Sigma-Aldrich              | Cat#613843 |
| Trimethylamine- <sup>13</sup> C <sub>3</sub> N-Oxide Hydrate | Toronto Research Chemicals | T795793    |
| Trimethylamine-d <sub>9</sub> N-Oxide                        | Sigma-Aldrich              | Cat#791628 |
| Tryptone                                                     | Sigma-Aldrich              | Cat#70169  |
| Yeast extract                                                | Bioshop                    | YEX401.500 |
| γ-Butyrobetaine-d <sub>9</sub> hydrochloride                 | Medical Isotopes           | D39211     |

---

### Commercial assays

|                                                              |             |          |
|--------------------------------------------------------------|-------------|----------|
| Spotchem II reagent strips: Total cholesterol                | Arkray Inc. | 77162    |
| Spotchem II reagent strips: Triglyceride                     | Arkray Inc. | 77163    |
| Spotchem II reagent strips: High-density lipoprotein (HDL-c) | Arkray Inc. | 77181    |
| Spotchem II reagent strips: Aspartate transaminase (AST)     | Arkray Inc. | 77169    |
| Spotchem II reagent strips: Alanine aminotransferase (ALT)   | Arkray Inc. | 77170    |
| QIAamp PowerFecal DNA Kit                                    | QIAGEN      | 12830-50 |

---

### Deposited data

|                                                              |            |                                                                              |
|--------------------------------------------------------------|------------|------------------------------------------------------------------------------|
| 16S rRNA gene sequencing of human and mouse fecal microbiota | This study | NCBI BioProject: PRJNA661156 and SRA: SRS7316558, SRS7317051, and SRS7315455 |
|--------------------------------------------------------------|------------|------------------------------------------------------------------------------|

---

### Mouse strains

|                                                             |                                           |           |
|-------------------------------------------------------------|-------------------------------------------|-----------|
| Mouse: C57BL/6JNarl                                         | National Laboratory Animal Center, Taiwan | RMRC11005 |
| Mouse: ApoE <sup>-/-</sup> ( <i>ApoE<sup>tm1Unc</sup></i> ) | Original from The Jackson Laboratory      | 002052    |

---

### Oligonucleotides

|                                                                                   |                |     |
|-----------------------------------------------------------------------------------|----------------|-----|
| Forward: 5'-TCG TCG GCA GCG TCA GAT GTG TAT AAG AGA CAG CCT ACG GGN GGC WGC AG-3' | Illumina, 2014 | N/A |
|-----------------------------------------------------------------------------------|----------------|-----|



Reverse: 5'-GTC TCG TGG GCT CGG AGA TGT    Illumina, 2014    N/A  
GTA TAA GAG ACA GGA CTA CHV GGG TAT  
CTA ATC C-3'

---

**Software**

---

|                                                                |                        |                                                                                                                                                                                                                                                                                                                                                   |
|----------------------------------------------------------------|------------------------|---------------------------------------------------------------------------------------------------------------------------------------------------------------------------------------------------------------------------------------------------------------------------------------------------------------------------------------------------|
| Image J software (Version 1.8.0)                               | Schneider et al., 2012 | <a href="https://imagej.nih.gov/ij/">https://imagej.nih.gov/ij/</a>                                                                                                                                                                                                                                                                               |
| 16S Bacteria/Archaea SOP v1 of the Microbiome Helper workflows | Comeau et al., 2017    | <a href="https://github.com/mlangill/microbiome_helper">https://github.com/mlangill/microbiome_helper</a>                                                                                                                                                                                                                                         |
| VSEARCH v2.1.2.                                                | Rognes et al., 2016    | <a href="https://github.com/rogn/vsearch">https://github.com/rogn/vsearch</a>                                                                                                                                                                                                                                                                     |
| QIIME v.1.9.1.                                                 | Caporaso et al., 2010  | <a href="http://qiime.org/">http://qiime.org/</a>                                                                                                                                                                                                                                                                                                 |
| Graphpad Prism (version 9.2.0)                                 | GraphPad Software Inc  | <a href="http://www.graphpad.com">http://www.graphpad.com</a>                                                                                                                                                                                                                                                                                     |
| R (version 3.6.1) with vegan and heatmap3 packages             | R Foundation           | <a href="https://www.r-project.org">https://www.r-project.org</a><br><a href="https://cran.r-project.org/web/packages/vegan/index.html">https://cran.r-project.org/web/packages/vegan/index.html</a><br><a href="https://cran.r-project.org/web/packages/heatmap3/heatmap3.pdf">https://cran.r-project.org/web/packages/heatmap3/heatmap3.pdf</a> |
| R Studio (version 1.2.5001)                                    | R Studio               | <a href="https://www.rstudio.com">https://www.rstudio.com</a>                                                                                                                                                                                                                                                                                     |

---

**Supplementary Table 3** | Gut microbiota medium (GMM) and its carbon-reduced medium recipe

| <b>Gut microbiota medium (GMM)</b>   | <b>Regular medium<br/>(1 L)</b> | <b>Carbon-reduced medium<br/>(1 L)</b> |
|--------------------------------------|---------------------------------|----------------------------------------|
| Tryptone Peptone                     | 2 g                             | 2 g                                    |
| Yeast Extract                        | 1 g                             | 1 g                                    |
| D-glucose                            | 0.4 g                           | -                                      |
| L-cysteine                           | 0.5 g                           | 0.5 g                                  |
| Cellobiose                           | 1 g                             | -                                      |
| Maltose                              | 1 g                             | -                                      |
| Fructose                             | 1 g                             | -                                      |
| Meat Extract                         | 5 g                             | 5 g                                    |
| KH <sub>2</sub> PO <sub>4</sub>      | 100 mL                          | 100 mL                                 |
| MgSO <sub>4</sub> -7H <sub>2</sub> O | 0.002 g                         | 0.002 g                                |
| NaHCO <sub>3</sub>                   | 0.4 g                           | 0.4 g                                  |
| NaCl <sub>2</sub>                    | 0.08 g                          | 0.08 g                                 |
| CaCl <sub>2</sub>                    | 1 mL                            | 1 mL                                   |
| Vitamin K (menadione)                | 1 mL                            | 1 mL                                   |
| FeSO <sub>4</sub>                    | 1 mL                            | 1 mL                                   |
| Histidine Hematin Solution           | 1 mL                            | 1 mL                                   |
| Tween 80                             | 2 mL                            | 2 mL                                   |
| ATCC Vitamin Mix                     | 10 mL                           | 10 mL                                  |
| ATCC Trace Mineral Mix               | 10 mL                           | 10 mL                                  |
| Acetic acid                          | 1.7 mL                          | 1.7 mL                                 |
| Isovaleric acid                      | 0.1 mL                          | 0.1 mL                                 |
| Propionic acid                       | 2 mL                            | 2 mL                                   |
| Butyric acid                         | 2 mL                            | 2 mL                                   |
| Resazurin                            | 4 mL                            | 4 mL                                   |

**Supplementary Table 4 | MEGA medium (MEGA) and its carbon-reduced medium recipe**

| <b>MEGA medium (MEGA)</b>                                                                                                                                             | <b>Regular medium<br/>(500 mL)</b> | <b>Carbon-reduced medium<br/>(500 mL)</b> |
|-----------------------------------------------------------------------------------------------------------------------------------------------------------------------|------------------------------------|-------------------------------------------|
| Tryptone Peptone                                                                                                                                                      | 5 g                                | 5 g                                       |
| Yeast Extract                                                                                                                                                         | 2.5 g                              | 2.5 g                                     |
| D-(+)-Glucose                                                                                                                                                         | 1 g                                | -                                         |
| L-Cysteine HCl                                                                                                                                                        | 0.25 g                             | 0.25 g                                    |
| 1 M Potassium Phosphate Buffer, pH 7.2                                                                                                                                | 50 mL                              | 50 mL                                     |
| TYG Salt Solution (0.5 g of MgSO <sub>4</sub> ·7H <sub>2</sub> O; 10.0 g of NaHCO <sub>3</sub> ; 2 g of NaCl in 1L of H <sub>2</sub> O)                               | 20 mL                              | 20 mL                                     |
| Vitamin K Solution                                                                                                                                                    | 500 µL of 1 mg/mL                  | 500 µL of 1 mg/mL                         |
| 0.8 % CaCl <sub>2</sub>                                                                                                                                               | 500 µL                             | 500 µL                                    |
| FeSO <sub>4</sub> ·7H <sub>2</sub> O                                                                                                                                  | 500 µL of 0.4 mg/mL                | 500 µL of 0.4 mg/mL                       |
| Resazurin                                                                                                                                                             | 2 mL of 0.25 mg/mL                 | 2 mL of 0.25 mg/mL                        |
| Histidine-Hematin                                                                                                                                                     | 500 µL                             | 500 µL                                    |
| dH <sub>2</sub> O                                                                                                                                                     | 150 mL                             | 150 mL                                    |
| D-(+)-Cellobiose                                                                                                                                                      | 0.5 g                              | 0.5 g                                     |
| D-(+)-Maltose                                                                                                                                                         | 0.5 g                              | 0.5 g                                     |
| D-(-)-Fructose                                                                                                                                                        | 0.5 g                              | 0.5 g                                     |
| Soluble Starch                                                                                                                                                        | 12.5 mL of 2%                      | 12.5 mL of 2%                             |
| Tween 80                                                                                                                                                              | 1 mL of 25%                        | 1 mL of 25%                               |
| Meat Extract                                                                                                                                                          | 2.5 g                              | 2.5 g                                     |
| Trace Mineral Supplement (ATCC)                                                                                                                                       | 5 mL                               | 5 mL                                      |
| Vitamin Supplement (ATCC)                                                                                                                                             | 5 mL                               | 5 mL                                      |
| SCFA Supplement Stock (Modified Recipe) (Final Moles/L in Media: Acetic acid (0.0297); Isovaleric acid(0.0009); Propionic acid (0.0081); and N-Butyric acid (0.0044)) | 3.75 mL                            | 3.75 mL                                   |

**Supplementary Table 5** | Wilkins–Chalgren medium (WC) and its carbon-reduced medium recipe

| <b>Wilkins-Chalgren medium (WC)</b> | <b>Regular medium<br/>(1 L)</b> | <b>Carbon-reduced medium<br/>(1 L)</b> |
|-------------------------------------|---------------------------------|----------------------------------------|
| Tryptone                            | 10 g                            | 10 g                                   |
| Gelatin peptone                     | 10 g                            | 10 g                                   |
| Yeast extract                       | 5 g                             | 5 g                                    |
| Glucose                             | 1 g                             | -                                      |
| Sodium chloride                     | 5 g                             | 5 g                                    |
| L-Arginine                          | 1 g                             | 1 g                                    |
| Sodium pyruvate                     | 1 g                             | 1 g                                    |
| Menadione                           | 0.0005 g                        | 0.0005 g                               |
| Hemin                               | 0.005 g                         | 0.005 g                                |
